# Characterising personal, household, and community PM<sub>2.5</sub> exposure in one urban and two rural communities in China

Ka Hung Chan<sup>1,2\*†</sup>, Xi Xia<sup>3,4\*</sup>, Cong Liu<sup>5</sup>, Haidong Kan<sup>5</sup>, Aiden Doherty<sup>2,6,7</sup>, Steve Hung Lam Yim<sup>8,9,10</sup>, Neil Wright<sup>1</sup>, Christiana Kartsonaki<sup>1,11</sup>, Xiaoming Yang<sup>1</sup>, Rebecca Stevens<sup>1</sup>, Xiaoyu Chang<sup>12</sup>, Dianjianyi Sun<sup>13,14</sup>, Canqing Yu<sup>13,14</sup>, Jun Lv<sup>13,14</sup>, Liming Li<sup>13,14</sup>, Kin-Fai Ho<sup>4†</sup>, Kin Bong Hubert Lam<sup>1‡</sup>, Zhengming Chen<sup>1,11‡</sup> on behalf of the China Kadoorie Biobank collaborative group<sup>§</sup>

<sup>1</sup> Clinical Trial Service Unit and Epidemiological Studies Unit, Nuffield Department of Population Health, University of Oxford, UK

<sup>2</sup> Oxford British Heart Foundation Centre of Research Excellence, University of Oxford, UK

<sup>3</sup> School of Public Health, Shaanxi University of Chinese Medicine, China

<sup>4</sup> The Jockey Club School of Public Health and Primary Care, The Chinese University of Hong Kong, Hong Kong SAR

<sup>5</sup> School of Public Health, Key Lab of Public Health Safety of the ministry of Education and NHC Key Lab of Health Technology Assessment, Fudan University, China

<sup>6</sup> Big Data Institute, Li Ka Shing Centre for Health Information and Discovery, University of Oxford, UK

<sup>7</sup> National Institute of Health Research Oxford Biomedical Research Centre, Oxford University Hospitals NHS Foundation Trust, John Radcliffe Hospital, UK

<sup>8</sup> Asian School of the Environment, Nanyang Technological University, Singapore

<sup>9</sup> Lee Kong Chian School of Medicine, Nanyang Technological University, Singapore

<sup>10</sup> Earth Observatory of Singapore, Nanyang Technological University, Singapore

<sup>11</sup> MRC Population Health Research Unit, Nuffield Department of Population Health, University of Oxford, UK

<sup>12</sup> NCDs Prevention and Control Department, Sichuan CDC, China

<sup>13</sup> Department of Epidemiology and Biostatistics, School of Public Health, Peking University Health Science Center, China

<sup>14</sup> Peking University Center for Public Health and Epidemic Preparedness and Response, China

\*Joint-first authors; †corresponding authors; ‡senior authors; §full member list in text S1

## Address for correspondence

Dr Ka Hung Chan, Clinical Trial Service Unit and Epidemiological Studies Unit, Nuffield Department of Population Health, University of Oxford; email: [kahung.chan@ndph.ox.ac.uk](mailto:kahung.chan@ndph.ox.ac.uk);

Prof Kin-Fai Ho, JC School of Public Health and Primary Care, The Chinese University of Hong Kong; email: [kfho@cuhk.edu.hk](mailto:kfho@cuhk.edu.hk)

Word count: Abstract 302; Main text 4071

2 Tables, 4 Figures, 3 eTables, 4 eFigures

(CKB Research Tracker No.: 2022-0045; CKB Data Release No.: 18.00)

04 April 2023

NOTE: This preprint reports new research that has not been certified by peer review and should not be used to guide clinical practice.

1 **Abstract**

2 **Background:** Cooking and heating in households contribute importantly to air pollution  
3 exposure worldwide. However, there is insufficient investigation of measured fine  
4 particulate matter (PM<sub>2.5</sub>) exposure levels, variability, seasonality, and inter-spatial  
5 dynamics associated with these behaviours.

6 **Methods:** We undertook parallel measurements of personal, household (kitchen and living  
7 room), and community PM<sub>2.5</sub> in summer (May-September 2017) and winter (November  
8 2017-Janauary 2018) in ~480 participants from one urban and two rural communities in  
9 China. These recorded ~61,000-81,000 person-hours of processed data per  
10 microenvironment. Age- and sex-adjusted geometric means of PM<sub>2.5</sub> were calculated by  
11 key participant characteristics, overall and by season. Spearman correlation coefficients  
12 between PM<sub>2.5</sub> levels across different microenvironments were computed.

13 **Findings:** Overall, 25.1% reported use of solid fuel for both cooking and heating. Solid fuel  
14 users had ~90% higher personal and kitchen 24-hour average PM<sub>2.5</sub> exposure than clean  
15 fuel users. Similarly, they also had a greater increase (~75% vs ~20%) in personal and  
16 household PM<sub>2.5</sub> from summer to winter, whereas community levels of PM<sub>2.5</sub> were 2-3  
17 times higher in winter regardless of fuel use. Compared with clean fuel users, solid fuel  
18 users had markedly higher weighted annual average PM<sub>2.5</sub> exposure at personal (77.8  
19 [95% CI 71.1-85.2] vs ~40 µg/m<sup>3</sup>), kitchen (103.7 [91.5-117.6] vs ~50 µg/m<sup>3</sup>) and living  
20 room (62.0 [57.1-67.4] vs ~40 µg/m<sup>3</sup>) microenvironments. There was a remarkable diurnal  
21 variability in PM<sub>2.5</sub> exposure among the participants, with 5-minute moving average 700-  
22 1,200µg/m<sup>3</sup> in typical meal times. Personal PM<sub>2.5</sub> was moderately correlated with living  
23 room (Spearman r: 0.64-0.66) and kitchen (0.52-0.59) levels, but only weakly correlated  
24 with community levels, especially in summer (0.15-0.34) and among solid fuel users (0.11-  
25 0.31).

26 **Conclusion:** Solid fuel use for cooking and heating was associated with substantially  
27 higher personal and household PM<sub>2.5</sub> exposure than clean fuel users. Household PM<sub>2.5</sub>  
28 appeared a better proxy of personal exposure than community PM<sub>2.5</sub> in this setting.

29

30

## 1 **1. Introduction**

2 The growing population and energy demand from rapid urbanisation, coupled with  
3 continued reliance of fossil fuels, have aggravated the ambient air pollution in many low-  
4 and middle-income countries (LMICs). On the other hand, about 3 billion individuals are  
5 still relying on solid fuels (e.g. coal, wood) for cooking and heating, which can result in  
6 intensive household air pollution.<sup>1,2</sup> Fine particulate matter (PM<sub>2.5</sub>) from domestic use of  
7 solid fuels and ambient sources together constitute the top environmental risk factor of  
8 disease burden globally, estimated to account for more than 6 million premature deaths in  
9 2019.<sup>1</sup> Despite the global health significance,<sup>3,4</sup> there remains substantial uncertainties in  
10 the exposure-disease relationships and thus disease burden estimation, as most existing  
11 epidemiological studies relied on exposure proxies, namely modelled ambient air pollution  
12 levels around residential addresses and self-reported fuel use for indoor or household air  
13 pollution exposure.<sup>3,5</sup>

14 Until recently, directly measured air pollution exposure data are rarely available in large  
15 population-based epidemiological studies. Most measurement studies had relatively small  
16 sample sizes, assessed primarily kitchen PM<sub>2.5</sub> levels, and were limited to one or a few  
17 rural communities, with limited repeated measurements across seasons.<sup>6-14</sup> The largest  
18 relevant study to date (PURE-Air) collected 48-hour aggregated kitchen and personal  
19 PM<sub>2.5</sub> data in ~2400 households and ~900 individuals, respectively, in rural areas from  
20 eight LMICs.<sup>6</sup> They found substantial variability in kitchen and personal PM<sub>2.5</sub> levels by  
21 cooking fuel types and across countries, with solid fuel users tend to show significantly  
22 higher exposure. However, the short measurement window, limited repeated seasonal  
23 measurements, and inadequate coverage of heating season exposure leave ambiguity to  
24 both within-week and seasonal exposure variability within and between individuals. There  
25 is also a need of time-resolved data and parallel assessment of not only personal and  
26 kitchen PM<sub>2.5</sub> but also living room and ambient levels to better understand the spatial-

1 temporal dynamics of PM<sub>2.5</sub> exposure. Data from urban areas will also offer additional  
2 insight into the urban-rural contrast in PM<sub>2.5</sub> exposure patterns.

3 We report detailed analyses of questionnaire data on personal characteristics, fuel use,  
4 and time-resolved PM<sub>2.5</sub> exposure data at personal, household, and community levels in  
5 ~480 participants from one urban and two rural areas in the China Kadoorie Biobank  
6 (CKB), repeatedly in the warm and cool seasons.<sup>15</sup> The present report aims to i) examine  
7 both aggregated and time-resolved PM<sub>2.5</sub> levels by fuel use and other key characteristics;  
8 and ii) clarify personal-household-community gradient of PM<sub>2.5</sub> exposure.

## 9 **2. Materials and Methods**

### 10 *2.1 Study design and sample*

11 CKB is an ongoing prospective cohort study of ~512,000 adults aged 30-79 years  
12 recruited from ten diverse areas of China during 2004-2008.<sup>16,17</sup> The CKB-Air study was  
13 nested within CKB, and details of the design, data collection procedures, data cleaning  
14 and processing, and participant characteristics have been published previously.<sup>15</sup> Briefly,  
15 488 participants (mean age 58 years, 72% women) were recruited from two rural (Gansu,  
16 Henan) and one urban (Suzhou) CKB study sites (**eFigure 1**), selected to capture a  
17 diverse range of fuel use patterns.<sup>18</sup> The study involved repeated assessment of air  
18 pollution and time-activity in the warm (May–September 2017; hereafter referred to as  
19 ‘summer’) and cool (November 2017–January 2018; ‘winter’) seasons, with a household  
20 questionnaire on participant characteristics and usual fuel use patterns administered in  
21 winter. Subsequently, 451 individuals participated in the summer assessment, of whom 37  
22 were not available in winter and were replaced by other eligible CKB participants in the  
23 same community. The participants included in the two seasons were similar in their socio-  
24 demographics and lifestyle characteristics documented in 2004-2008 during the baseline  
25 assessment.<sup>15</sup>

1 The study was approved by the Oxford University Tropical Research Ethics Committee,  
2 Oxford, UK (Ref: 5109-17) and the institutional review board of Fuwai Hospital, Chinese  
3 Academy of Medical Sciences, Beijing, China (Ref: 2018-1038). All participants provided  
4 written informed consent upon recruitment.

## 5 *2.2 Questionnaire data*

6 Trained health workers administered a laptop-based household questionnaire in the cool  
7 season, to assess personal characteristics (age, sex, household income, occupation,  
8 smoking, environmental tobacco smoke exposure) and exposure to household air pollution  
9 (cooking and heating patterns and all fuel types used) (**Text S2**). For those who reported  
10 different cooking patterns or fuel use in summer, additional questions on exposure during  
11 summer were asked. While many previous studies focused on a single primary cooking or  
12 heating fuels, we attempted to capture the increasingly recognised ‘fuel stacking’  
13 phenomenon by assessing all fuel types used.<sup>18</sup> Cooking fuel combinations were derived  
14 based on all fuel types reported to be ‘used in most meals’ or ‘sometimes’. A similar  
15 approach was undertaken to derive ‘heating fuel combination’ based on the duration of  
16 heating fuel use during winter. Clean fuels include gas, electricity, solar, and city-wide  
17 district heating (for heating only); solid fuels include coal (smoky/smokeless), coal  
18 briquette, charcoal, wood, and crop residue. The electronic questionnaire have built-in  
19 error and logic checks to minimise missing data and human errors.

## 20 *2.3 Air pollution data*

### 21 *2.3.1 Air pollution monitors*

22 The study involved ~120 consecutive hours of measurements (at 1-minute resolution) of  
23 fine particulate matter (PM<sub>2.5</sub>; µg/m<sup>3</sup>) levels, temperature, and relative humidity (%) in three  
24 different microenvironments (personal, kitchen, and living room) for each participant, both  
25 in summer and winter except for those who only participated in one season (n=74). The

1 measurements were taken using PATS (Particle and Temperature Sensor; Berkeley Air  
2 Monitoring Group, CA, USA), an internationally validated low-cost nephelometer-based  
3 device ( $R^2$  range: 0.90-0.99 with reference to both with well-established time-resolved  
4 instruments [e.g. TSI DustTrak] and gravimetric measurements) developed for high  
5 household air pollution settings ( $PM_{2.5}$  detection range: 10-30,000  $\mu\text{g}/\text{m}^3$ ).<sup>19</sup> At each study  
6 site, community air pollution ( $PM_1$ ,  $PM_{2.5}$ ,  $PM_{10}$ , carbon monoxide, ozone, and nitrogen  
7 oxides) was measured on the roof top of a building in a central location away from any  
8 proximal sources of pollution, using two tailor-made research instruments (NAS-AF100;  
9 Sapiens Environmental Technology, Hong Kong, China).

10 Details of quality control and device calibration have been described previously.<sup>15</sup> In brief,  
11 all devices were factory-calibrated against wood smoke by the manufacturers, and further  
12 calibrated using filter-based personal and static samplers for PM measurements.

13 Randomly selected PATS ( $n=15$ ) were also tested for consistency through co-location  
14 comparison tests in controlled settings for 24 hours, with good agreement demonstrated  
15 (correlation coefficients: 0.85-0.99). Before and after each deployment, the PATS devices  
16 were calibrated against HEPA-filtered air for 10 minutes, following the manufacturer's  
17 standardised procedures.

### 18 *2.3.2 Data cleaning and processing*

19 Participants with corrupted data files due to human or device error were excluded from the  
20  $PM_{2.5}$  analyses (**eFigure 2**). Twenty-nine and 115 participants in the warm and cool  
21 seasons, respectively, had no community air pollution data from NAS-F100 due to delays  
22 in deployment or other logistical challenges (**eFigure 2**). The time-resolved  $PM_{2.5}$  data  
23 from each PATS were then inspected and processed by i) downsizing to 5-minute moving  
24 averages time-series to facilitate computation, ii) applying 20-minute moving median  
25 smoothing to replace sporadic extreme spikes, and iii) adjusting data points at persistently  
26 high or low (i.e. at the lower limit of detection of  $10\mu\text{g}/\text{m}^3$ ) levels by cross-device

1 calibration. Specifically, potentially erroneous data from one device were replaced by  
2 imputed data based on levels recorded in the other devices using generalised linear  
3 regression. The persistently high levels were likely caused by particles lodged inside the  
4 nephelometer or sustained direct light impact; whereas the persistently low levels, most of  
5 which were found in the personal PATS data during winter, are likely due to an obstructed  
6 air inlet (e.g. covered by clothing) or that the PATS was placed inside an enclosed  
7 environment (e.g. in a drawer when participants took it off during bathing or sleep).  
8 Overall, only <5% of the PM<sub>2.5</sub> data recorded were flagged as persistently high or low,  
9 indicating generally high data quality (**eTable 1**).

10 We first removed data from the first and last hour of the measurement period when  
11 participants' exposure was likely affected by the study procedures. We then removed  
12 participants with <24 hours of effective data, which could happen due to battery failure.  
13 Subsequently, each of the remaining participants had at least 24 hours' worth of data per  
14 PATS per season (median<sub>summer</sub> [Q1-Q3]: 117 [105-119] hours, median<sub>winter</sub> [Q1-Q3]: 113  
15 [94-117] hours) (**eTable 2**). To further enhance the quality of the analytical dataset, we  
16 undertook a conservative approach to remove participants (n=36) with >50% data flagged  
17 as persistently high or low in any one PATS (regardless of the quality of the other two  
18 device), thereby restricting the analyses to participants with data of satisfactory quality  
19 across all three PATSs (n<sub>summer</sub>=419 [92.7%]; n<sub>winter</sub>=365 [81.1%]). Thirty-five participants  
20 in summer who did not provide household questionnaire data were further excluded.

21 The numbers of participants excluded at each stage of data analysis are shown in **eFigure**  
22 **2**. After data cleaning, the primary analyses on PM<sub>2.5</sub> included 384 participants, with a total  
23 of 80,980 person-hours of PM<sub>2.5</sub> data each at the personal, kitchen, and living room, and  
24 67,326 person-hours of data at the community level (**eTable 2**).

25 *2.4 Data analysis*

1 Using linear regression, we estimated age- and sex-adjusted (where appropriate)  
2 geometric means and 95% confidence intervals (CI) of personal and household (kitchen  
3 and living room) PM<sub>2.5</sub> concentrations levels, by demographic characteristics (age, sex,  
4 study area, education, occupation, smoking, household size) and household air pollution-  
5 related exposures (cooking frequency, self-reported 'smoky home' while cooking or  
6 heating, and cooking and heating fuel combinations), stratified by season. We also  
7 averaged the time-resolved data to produce season-specific 24-hour PM<sub>2.5</sub> time-series at  
8 personal, household, and community levels, according to different cooking and heating  
9 fuel combinations.

10 We obtained regional temperature data during 2005-2017 (corresponding to the follow-up  
11 period of the CKB cohort up till the commencement of CKB-Air) from local meteorological  
12 offices and calculated the proportion of months with an average temperature <10°C in  
13 each region (0.25 for Suzhou, 0.42 for Gansu, 0.33 for Henan), which was used as a  
14 weighting coefficient to approximate heating fuel usage. We then estimated  
15 microenvironment-specific annual PM<sub>2.5</sub> exposure levels as a weighted average of  
16 exposure levels across summer and winter, by cooking and heating fuel combinations:  
17  $annual\ average_{ij} = w_{ij} * (1 - p_k) + c_{ij} * p_k$ , where  $w_{ij}$  is the summer average and  $c_{ij}$  the  
18 winter average for microenvironment  $i$  (personal, kitchen, living room, or community)  
19 among participants in category  $j$  of cooking and heating fuel combination (no cooking or  
20 heating, clean fuels only, any solid fuels), and  $p_k$  is a region-specific weighting coefficient  
21 of heating fuel usage described above.

22 As a preliminary investigation to understand the relationships between PM<sub>2.5</sub> levels across  
23 microenvironments and by season, we have examined the season-specific Spearman  
24 correlation of log-transformed PM<sub>2.5</sub> levels across the four microenvironments overall and  
25 by cooking and heating fuel combinations.



## 1 *Role of the funding source*

2 The study funders had no role in study design, data collection, analysis, interpretation, or  
3 writing of the report. KHC, XX, KH, KBHL, and ZC had access to all data and had final  
4 responsibility for the decision to submit for publication.

## 5 **3. Results**

### 6 *3.1 Basic characteristics and PM<sub>2.5</sub> levels*

7 Of the 384 participants included in the main analyses, the mean age was 58.2 [SD 6.6]  
8 years, 74.7% were women, and 32.0% and 52.2% used solid fuels for cooking and  
9 heating, respectively. In particular, those who used solid fuels for cooking were more likely  
10 to be women, from rural areas, less educated, agricultural workers or home-makers, and  
11 to use solid fuel for heating (**eTable 3**). Moreover, substantially more solid fuel users  
12 reported observing a smoky home while cooking or heating compared to clean fuel users.

13 Overall, levels of exposure to PM<sub>2.5</sub> were generally higher in younger (<65 years)  
14 participants, women, and those with lower education, with markedly higher levels in winter  
15 than in summer (**Table 1**). Agricultural workers, active smokers, and participants who  
16 reported a smoky home while cooking had particularly high PM<sub>2.5</sub> exposure, most notably  
17 at personal and kitchen levels, both in summer and winter. For example, average kitchen  
18 PM<sub>2.5</sub> in summer for those observing smoky home while cooking was 53.7 [95% CI 49.7-  
19 58.0] compared to 40.9 [38.5-43.5] for those without such observation, and in winter 119.5  
20 [107.7-132.5] µg/m<sup>3</sup> compared to 61.8 [56.6-67.6] µg/m<sup>3</sup>. Participants who reported smoky  
21 home while heating had somewhat lower personal and living room PM<sub>2.5</sub> levels in summer,  
22 but significantly higher personal (82.0 [74.9-89.7] vs 55.3 [51.2-59.8] µg/m<sup>3</sup>), kitchen  
23 (127.9 [114.8-142.4] vs 72.6 [66.2-79.6] µg/m<sup>3</sup>), and living room (72.5 [66.4-79.2] vs 54.2  
24 [50.2-58.4] µg/m<sup>3</sup>) levels in winter. There was no clear pattern by household size.

### 25 *3.2 PM<sub>2.5</sub> levels by fuel use patterns*

1 Compared across primary cooking and heating fuel combinations, solid fuel users had  
2 ~90% higher personal and kitchen PM<sub>2.5</sub> levels than those who used clean fuels or did not  
3 cook or heat (**Figure 1A**). Personal and household PM<sub>2.5</sub> levels were significantly (~75%)  
4 higher in winter among solid fuel users, but less so for other participants (~20%), whilst  
5 community levels were 2-3 times higher across different fuel combinations. Broadly similar  
6 patterns were observed when examining cooking and heating fuel combinations separately  
7 (**Figures 1B and 1C**), but there was a more obvious gradient of exposure at personal and  
8 kitchen levels across cooking fuel combinations (as opposed to heating fuel), from the  
9 lowest in non-cooking households (winter: ~50 µg/m<sup>3</sup>) to the highest in solid fuel users  
10 (~115µg/m<sup>3</sup>). A sensitivity analysis restricted to participants who personally cooked  
11 regularly showed similar patterns (**eFigure 3**). Consistently, participants who had used  
12 solid fuels for cooking or heating had the highest weighted average annual PM<sub>2.5</sub> exposure  
13 at the personal (77.8 [71.1-85.2] µg/m<sup>3</sup>; ~90% higher), kitchen (103.7 [91.5-117.6] µg/m<sup>3</sup>;  
14 ~130% higher), and living room (62.0 [57.1-67.4] µg/m<sup>3</sup>; ~65% higher) levels, compared to  
15 those who reported using clean fuels or not cooking or heating (**Table 2**). There was no  
16 material difference in annual community PM<sub>2.5</sub> levels by these groups. Similar patterns  
17 were observed when examining by cooking and heating fuel combinations separately.

18 When examining the aggregated diurnal PM<sub>2.5</sub> patterns by cooking fuel combinations, we  
19 observed major peaks at around noon and evening time for both solid fuel and clean fuel  
20 users (less so for non-cooking households), and these peaks were substantially higher in  
21 solid fuel users, up to ~600 and ~1200µg/m<sup>3</sup> in summer and winter, respectively (**Figure**  
22 **2A-C**). A small morning peak (~08:00) was also found in the kitchen in winter (**Figure 2B**).  
23 Interestingly, personal, kitchen, and living room PM<sub>2.5</sub> levels were considerably higher  
24 most of the time among clean fuel users than non-cooking households. Solid fuel users  
25 appeared to have the lowest community PM<sub>2.5</sub> exposure in summer, but highest in winter,  
26 with broadly concordant diurnal variations for all three fuel use categories (**Figure 2D**).

1 The differences in diurnal exposure levels by heating fuel combinations were largely  
2 similar to those by cooking fuels in summer, but in winter the exposure levels in individuals  
3 who did not have heating were just slightly lower than the solid fuel users but much higher  
4 than clean fuel users (**Figure 3**).

### 5 *3.3 PM<sub>2.5</sub> exposure models and inter-spatial correlation*

6 We found moderate correlation between measured PM<sub>2.5</sub> at personal, living room (r: 0.64-  
7 0.66), and kitchen (0.52-0.59) levels, whilst the correlation of personal and household  
8 levels with community levels was weaker, especially in summer (r<sub>range\_summer</sub>: 0.15-0.34;  
9 r<sub>range\_winter</sub>: 0.41-0.55) (**Figure 4**). Stratified by cooking and heating fuel combinations, we  
10 found the highest correlation of personal and household with community levels among  
11 those reporting no cooking or heating (r<sub>range\_summer</sub>: 0.52-0.65; r<sub>range\_winter</sub>: 0.55-0.62), and  
12 weakest among those who used solid fuels (r<sub>range\_summer</sub>: 0.11-0.31; r<sub>range\_winter</sub>: 0.29-0.52)  
13 (**eFigures 4A-C**).

## 14 **4. Discussion**

15 We reported integrated and time-resolved PM<sub>2.5</sub> levels at personal, household (kitchen and  
16 living room), and community environments by cooking and heating fuel combinations and  
17 other key characteristics in ~360 adults from one urban and two rural areas of China. Solid  
18 fuel use for cooking and heating was associated with significantly higher estimated annual  
19 PM<sub>2.5</sub> exposure at both personal and household levels, with personal PM<sub>2.5</sub> exposure at ~3  
20 times and 5 times the World Health Organization 24-hour Air Quality Guidelines (WHO  
21 AQG) level (15µg/m<sup>3</sup>) in summer and winter, respectively, and an estimated annual  
22 personal exposure at over 15 times of the WHO annual AQG level (5µg/m<sup>3</sup>)<sup>20</sup>. The PM<sub>2.5</sub>  
23 levels across all microenvironments were higher in winter than summer, with ~2-3 times  
24 higher community levels regardless of fuel use. Time-resolved data showed vast inter- and  
25 intra-personal variability in PM<sub>2.5</sub> exposure within and across seasons, with remarkably

1 high exposure (5-min moving-average up to  $1200\mu\text{g}/\text{m}^3$ ) recorded in typical cooking times  
2 (~2-4 hours per day), most notably in the kitchen but also personal monitors among solid  
3 fuel users.

4 Previous studies assessing exposures to air pollution were highly heterogeneous in  
5 settings, sample size, prevalent fuel types, and recorded  $\text{PM}_{2.5}$  levels,<sup>6-14</sup> but there has  
6 been broadly consistent evidence that solid fuel use for cooking was associated with  
7 higher personal and kitchen  $\text{PM}_{2.5}$  levels as reported in our study. For logistical and  
8 technical reasons, most previous studies primarily measured kitchen  $\text{PM}_{2.5}$ ,<sup>6-14,21</sup> while  
9 some had parallel measurements of personal<sup>6,7,14</sup> or ambient<sup>10,14,21</sup> exposure, with most  
10 personal measurements done in a subset of participants. Notably, the largest single  
11 sample (n=998; ~48,000 person-hours) of personal  $\text{PM}_{2.5}$  measurements (alongside  
12 kitchen measurements in 2,541 households) came from the PURE-Air study focussing on  
13 cooking fuel in rural areas across eight countries.<sup>6</sup> With 48-hour integrated  $\text{PM}_{2.5}$   
14 measurements, they found lower  $\text{PM}_{2.5}$  levels by cooking fuel types moving up the  
15 traditional 'energy ladder' (i.e. from heavily polluting biomass to coal, then to gas and  
16 electricity),<sup>22</sup> but they also found substantial heterogeneity within each solid fuel category  
17 and between countries (e.g. kitchen  $\text{PM}_{2.5}$  for primary wood use was 50 [45-55]  $\mu\text{g}/\text{m}^3$  in  
18 China and 105 [96-116]  $\mu\text{g}/\text{m}^3$  in India), possibly due to varying fuel use behaviour or  
19 infrastructure, chemical constituents of fuels, and different climate conditions. With the  
20 parallel and repeated time-resolved assessment of personal, kitchen, living room (~81,000  
21 person-hours for each measure), and community (~67,000 person-hours) level  $\text{PM}_{2.5}$  in  
22 summer and winter, we provided further insight into the complex relationships between  
23 fuel use behaviour and  $\text{PM}_{2.5}$  levels across the personal-household-community exposure  
24 spectrum.

25 Consistent with the few existing studies that ascertained multiple fuel use,<sup>6,10,14</sup> we showed  
26 that fuel stacking was common in rural China, and mixed use of solid and clean fuels was

1 associated with substantially elevated PM<sub>2.5</sub> exposure, especially in winter. As fuel  
2 stacking is increasingly common in many developing economies, this highlights the  
3 importance of capturing usage information beyond a single, primary fuel type, in order to  
4 more accurately assess household air pollution exposure and the associated disease  
5 burden. On the other hand, until recently, both researchers and policymakers have largely  
6 overlooked heating as a major contributor of air pollution.<sup>18,23-25</sup> Our findings add to the  
7 previous field measurement studies,<sup>26-28</sup> showing solid fuels for heating to be associated  
8 with 76-125% higher PM<sub>2.5</sub> exposure at personal and household levels in winter. It may  
9 seem counterintuitive to observe a higher level in the kitchen than in the living room, but  
10 previous studies have noted poorer ventilation in winter and that solid fuel users may stay  
11 in the kitchen longer to get warmth from the cookstove to save fuel.<sup>22</sup> In line with a slower  
12 rate of modernisation of heating (versus cooking) fuel in China (as in many other  
13 LMICs),<sup>18,24</sup> about 50% of CKB-Air participants who had used clean fuels for cooking still  
14 relied on solid fuels for heating. Adding to the complexity, the lack of heating in rural China  
15 was associated with a lower socioeconomic status and greater likelihood of using solid  
16 fuels for cooking compared to clean fuel users.<sup>18</sup> This, together with the likely reduced  
17 ventilation (to keep warm) in winter time, may explain the considerably (~30%) higher  
18 personal and household PM<sub>2.5</sub> levels (in both seasons) among our participants who  
19 reported 'no heating', compared with the clean heating fuel users.

20 While the community PM<sub>2.5</sub> level was markedly higher in winter regardless of fuel use  
21 categories, there was an interesting contrast that solid fuel users had the lowest  
22 community PM<sub>2.5</sub> in summer, but the highest in winter. The 'winter smog' phenomenon in  
23 densely populated (often urban) areas of China is well-documented, as increased energy  
24 consumption, reliance on coal-fired power plants, and meteorological factors (e.g.  
25 temperature inversion) drive heightened regional ambient air pollution.<sup>29</sup> On the other  
26 hand, most solid fuel users resided in rural areas with lower population and vehicle

1 density, which tend to be associated with lower ambient air pollution. In winter, however,  
2 the intensive use of solid fuels for heating (most participants reported heating throughout  
3 the day) could result in major rise of neighbourhood PM<sub>2.5</sub> in addition to regional ambient  
4 air pollution, as supported by previous studies.<sup>14,30</sup> It is also worth noting that the increase  
5 in personal and household levels was much higher in solid fuel users than in other  
6 participants, whose personal and household levels were less than 50% of the community  
7 levels.

8 As in many previous studies<sup>14,21</sup> we observed relatively weak correlation between personal  
9 and community PM<sub>2.5</sub> levels, which poses challenges to the previous disease burden  
10 estimates for ambient air pollution in LMICs based mainly on epidemiological studies using  
11 modelled ambient levels without accounting for inter-spatial variability and people's time  
12 spent indoors (typically 70-80%).<sup>31</sup> This may be less problematic in HICs with relatively low  
13 exposure from non-ambient sources, although the re-emergence of wood-fire heating may  
14 raise concern.<sup>32</sup> The relatively strong correlation (0.52-0.66) between personal and  
15 household measurements is consistent with previous evidence (e.g. PURE-Air: person-to-  
16 kitchen correlation = 0.69). Our evidence adds further support for more granular household  
17 measurements along with housing characteristics questionnaires, simple personal GPS  
18 trackers, and advanced ambient air pollution modelling approaches<sup>33,34</sup> to better  
19 approximate personal exposure in large-scale epidemiological studies. More in-depth  
20 modelling analysis on our data will generate further insight for better exposure  
21 approximation in future studies.

22 Our time-resolved data also illustrated the remarkable short-term intra- and inter-personal  
23 variability in PM<sub>2.5</sub> exposure even within each fuel use category. The diurnal patterns of  
24 kitchen PM<sub>2.5</sub> appeared consistent with the previously reported time-activity patterns in  
25 CKB-Air,<sup>15</sup> such as the exposure peaks (averaged twice in summer; 3 times in winter) at  
26 typical meal times. Furthermore, we observed stronger and longer-lasting evening peaks

1 of personal and household levels among individuals who used solid fuels in winter, which  
2 is consistent with typical space heating practices with reduced ventilation at night. The vast  
3 diurnal variations, with personal PM<sub>2.5</sub> exposure as high as 400µg/m<sup>3</sup> and as low as  
4 10µg/m<sup>3</sup>, lead to the question of whether and how long-term average exposure could  
5 compare to an accumulation of repeated bursts of extreme exposure in relation to disease  
6 development risk.<sup>35</sup> The mystery might be solved by the increasing availability of more  
7 refined air pollution data, the use of chamber studies, and the emerging multi-omics  
8 technologies that facilitate a better understanding of the toxicology and pathophysiology.

9 CKB-Air offers one of the most detailed parallel and repeated seasonal assessments of  
10 personal, household, and community level PM<sub>2.5</sub> with one of the largest time-resolved  
11 datasets (up to ~80,000 person-hours per microenvironment). Moreover, we assessed not  
12 only the role of parallel fuel use for cooking but also for heating on both average and time-  
13 resolved PM<sub>2.5</sub> exposure, shedding light on the complexity of fuel use behaviour and PM<sub>2.5</sub>  
14 exposure. However, several limitations warrant discussion. First, despite the relatively  
15 large amount of data captured, the number of participants representing each fuel use  
16 combination beyond the aggregated categories on solid versus clean fuels was small.  
17 Also, the large inter-and intra-personal variability means that we could not reliably estimate  
18 PM<sub>2.5</sub> levels by >10 different fuel combinations captured. Second, unlike some previous  
19 studies that used gold-standard gravimetric samplers in measuring integrated PM<sub>2.5</sub>  
20 exposure,<sup>6</sup> we used a nephelometer in order to obtain detailed time-resolved data. Despite  
21 the field- and lab-based validation and calibration, our instruments inevitably entailed  
22 measurement error, but this should not result in major biases that would affect the  
23 applicability in epidemiological studies. Third, we assessed community PM<sub>2.5</sub> at a single  
24 location, and we lacked pairwise data of street and regional levels. Fourth, the study  
25 sample was recruited via convenient sampling from three purposively selected areas in

1 China, so the estimated exposure levels would not be generalisable to China or other  
2 populations.

### 3 **5. Conclusions**

4 This study has demonstrated the feasibility and value of collecting detailed air pollution  
5 exposure measurement data to capture intra- and inter-personal variations over short  
6 (weekly) and medium (seasonal) term, in rural and urban China. Most notably, the  
7 individuals who used solid fuels for cooking or heating were found to have annual personal  
8  $PM_{2.5}$  exposure over 15 times higher than the latest WHO AQG. The relatively weak  
9 correlation of personal with community  $PM_{2.5}$ , in contrast to the stronger correlation  
10 between personal and household levels, supports the use of reliable, low-cost household  
11 static monitors in improving personal air pollution exposure assessment in large-scale  
12 epidemiological studies. Our findings underscores the complexity of air pollution exposure  
13 and the need for cross-disciplinary investigation involving exposure science, toxicology,  
14 epidemiology and statistics.

15



## 1 References

- 2 1 Health Effect Institute. State of global air 2020. (Boston, MA, 2020).
- 3 2 Stoner, O. *et al.* Household cooking fuel estimates at global and country level for  
4 1990 to 2030. *Nat Commun* **12**, 5793 (2021). [https://doi.org:10.1038/s41467-021-](https://doi.org/10.1038/s41467-021-26036-x)  
5 [26036-x](https://doi.org/10.1038/s41467-021-26036-x)
- 6 3 Indoor air pollution kills and science needs to step up. *Nature* **614**, 196 (2023).  
7 [https://doi.org:10.1038/d41586-023-00338-0](https://doi.org/10.1038/d41586-023-00338-0)
- 8 4 Lewis, A. C., Jenkins, D. & Whitty, C. J. M. Hidden harms of indoor air pollution -  
9 five steps to expose them. *Nature* **614**, 220-223 (2023).  
10 [https://doi.org:10.1038/d41586-023-00287-8](https://doi.org/10.1038/d41586-023-00287-8)
- 11 5 Chan, K. H., Newell, K. & Lam, K. B. in *Environmental pollutant exposures and*  
12 *public health* (ed R. Harrison) (Royal Society for Chemistry, 2020).
- 13 6 Organization, W. H. Particulate matter (PM<sub>2.5</sub> and PM<sub>10</sub>), ozone, nitrogen dioxide,  
14 sulfur dioxide and carbon monoxide. (World Health Organization, Geneva, 2021).
- 15 7 Morawska, L. *et al.* Applications of low-cost sensing technologies for air quality  
16 monitoring and exposure assessment: How far have they gone? *Environ Int* **116**,  
17 286-299 (2018). [https://doi.org:10.1016/j.envint.2018.04.018](https://doi.org/10.1016/j.envint.2018.04.018)
- 18 8 Shupler, M. *et al.* Household and personal air pollution exposure measurements  
19 from 120 communities in eight countries: results from the PURE-AIR study. *Lancet*  
20 *Planet Health* **4**, e451-e462 (2020). [https://doi.org:10.1016/s2542-5196\(20\)30197-2](https://doi.org/10.1016/s2542-5196(20)30197-2)
- 21 9 Ye, W., Saikawa, E., Avramov, A., Cho, S. H. & Chartier, R. Household air pollution  
22 and personal exposure from burning firewood and yak dung in summer in the  
23 eastern Tibetan Plateau. *Environ Pollut* **263**, 114531 (2020).  
24 [https://doi.org:10.1016/j.envpol.2020.114531](https://doi.org/10.1016/j.envpol.2020.114531)
- 25 10 Benka-Coker, M. L. *et al.* Kitchen concentrations of fine particulate matter and  
26 particle number concentration in households using biomass cookstoves in rural

- 1 Honduras. *Environ Pollut* **258**, 113697 (2020).  
2 <https://doi.org/10.1016/j.envpol.2019.113697>
- 3 11 Tong, X. *et al.* Indoor air pollutant exposure and determinant factors controlling  
4 household air quality for elderly people in Hong Kong. *Air Qual Atmos Health* **11**,  
5 695-704 (2018). <https://doi.org/10.1007/s11869-018-0576-2>
- 6 12 Snider, G. *et al.* Impacts of stove use patterns and outdoor air quality on household  
7 air pollution and cardiovascular mortality in southwestern China. *Environ Int* **117**,  
8 116-124 (2018). <https://doi.org/10.1016/j.envint.2018.04.048>
- 9 13 Shupler, M. *et al.* Global household air pollution database: Kitchen concentrations  
10 and personal exposures of particulate matter and carbon monoxide. *Data Brief* **21**,  
11 1292-1295 (2018). <https://doi.org/10.1016/j.dib.2018.10.120>
- 12 14 Balakrishnan, K. *et al.* Exposures to fine particulate matter (PM<sub>2.5</sub>) and birthweight  
13 in a rural-urban, mother-child cohort in Tamil Nadu, India. *Environ Res* **161**, 524-  
14 531 (2018). <https://doi.org/10.1016/j.envres.2017.11.050>
- 15 15 Sidhu, M. K., Ravindra, K., Mor, S. & John, S. Household air pollution from various  
16 types of rural kitchens and its exposure assessment. *Sci Total Environ* **586**, 419-  
17 429 (2017). <https://doi.org/10.1016/j.scitotenv.2017.01.051>
- 18 16 Ni, K. *et al.* Seasonal variation in outdoor, indoor, and personal air pollution  
19 exposures of women using wood stoves in the Tibetan Plateau: Baseline  
20 assessment for an energy intervention study. *Environ Int* **94**, 449-457 (2016).  
21 <https://doi.org/10.1016/j.envint.2016.05.029>
- 22 17 Chan, K. H. *et al.* Regional and seasonal variations in household and personal  
23 exposures to air pollution in one urban and two rural Chinese communities: a pilot  
24 study to collect time-resolved data using static and wearable devices. *Environ Int*  
25 **146**, 106217 (2021). <https://doi.org/10.1016/j.envint.2020.106217>

- 1 18 Chen, Z. *et al.* China Kadoorie Biobank of 0.5 million people: survey methods,  
2 baseline characteristics and long-term follow-up. *Int J Epidemiol* **40**, 1652-1666  
3 (2011). <https://doi.org/10.1093/ije/dyr120>
- 4 19 Chen, Z. *et al.* Cohort profile: the Kadoorie Study of Chronic Disease in China  
5 (KSCDC). *Int J Epidemiol* **34**, 1243-1249 (2005). <https://doi.org/10.1093/ije/dyi174>
- 6 20 Chan, K. H. *et al.* Trans-generational changes and rural-urban inequality in  
7 household fuel use and cookstove ventilation in China: A multi-region study of 0.5  
8 million adults. *Int J Hyg Environ Health* **220**, 1370-1381 (2017).  
9 [https://doi.org:https://doi.org/10.1016/j.ijheh.2017.09.010](https://doi.org/https://doi.org/10.1016/j.ijheh.2017.09.010)
- 10 21 Pillarisetti, A. *et al.* Small, smart, fast, and cheap: microchip-based sensors to  
11 estimate air pollution exposures in rural households. *Sensors (Basel)* **17**, 1879  
12 (2017). <https://doi.org/10.3390/s17081879>
- 13 22 WHO global air quality guidelines. Particulate matter (PM2.5 and PM10), ozone,  
14 nitrogen dioxide, sulfur dioxide and carbon monoxide. (World Health Organization,  
15 Geneva, 2021).
- 16 23 Han, Y. *et al.* Difference in ambient-personal exposure to PM2.5 and its  
17 inflammatory effect in local residents in urban and peri-urban Beijing, China: results  
18 of the AIRLESS project. *Faraday Discuss* **226**, 569-583 (2021).  
19 <https://doi.org/10.1039/d0fd00097c>
- 20 24 Gordon, S. B. *et al.* Respiratory risks from household air pollution in low and middle  
21 income countries. *Lancet Respir Med* **2**, 823-860 (2014).  
22 [https://doi.org/10.1016/s2213-2600\(14\)70168-7](https://doi.org/10.1016/s2213-2600(14)70168-7)
- 23 25 Chen, Y. *et al.* Estimating household air pollution exposures and health impacts  
24 from space heating in rural China. *Environ Int* **119**, 117-124 (2018).  
25 <https://doi.org/10.1016/j.envint.2018.04.054>

- 1 26 Tao, S. *et al.* Quantifying the rural residential energy transition in China from 1992  
2 to 2012 through a representative national survey. *Nat Energy* **3**, 567-573 (2018).  
3 <https://doi.org/10.1038/s41560-018-0158-4>
- 4 27 World Health Organization. Burning Opportunity: Clean Household Energy for  
5 Health, Sustainable development, and Wellbeing of Women and Children Executive  
6 Summary. (World Health Organization, Geneva, Switzerland, 2016).
- 7 28 Liao, J. *et al.* The impact of household cooking and heating with solid fuels on  
8 ambient PM 2.5 in peri-urban Beijing. *Atmos Environ* **165**, 62-72 (2017).  
9 <https://doi.org/10.1016/j.atmosenv.2017.05.053>
- 10 29 Carter, E. *et al.* Seasonal and diurnal air pollution from residential cooking and  
11 space heating in the eastern Tibetan Plateau. *Environ Sci Technol* **50**, 8353-8361  
12 (2016). <https://doi.org/10.1021/acs.est.6b00082>
- 13 30 Walker, E. S. *et al.* Indoor fine particulate matter and demographic, household, and  
14 wood stove characteristics among rural US homes heated with wood fuel. *Indoor Air*  
15 **31**, 1109-1124 (2021). <https://doi.org/10.1111/ina.12808>
- 16 31 Gu, Y. & Yim, S. H. The air quality and health impacts of domestic trans-boundary  
17 pollution in various regions of China. *Environ Int* **97**, 117-124 (2016).  
18 <https://doi.org/10.1016/j.envint.2016.08.004>
- 19 32 Hu, W. *et al.* Characterization of outdoor air pollution from solid fuel combustion in  
20 Xuanwei and Fuyuan, a rural region of China. *Sci Rep* **10**, 11335 (2020).  
21 <https://doi.org/10.1038/s41598-020-68229-2>
- 22 33 Murray, C. J. L. *et al.* Global burden of 87 risk factors in 204 countries and  
23 territories, 1990–2019: a systematic analysis for the Global Burden of Disease  
24 Study 2019. *Lancet* **396**, 1223-1249 (2020). [https://doi.org/10.1016/s0140-](https://doi.org/10.1016/s0140-6736(20)30752-2)  
25 [6736\(20\)30752-2](https://doi.org/10.1016/s0140-6736(20)30752-2)

- 1 34 Department for Environment Food & Rural Affairs. *Emissions of air pollutants in the*  
2 *UK - Particulate matter (PM10 and PM2.5)*,  
3 [https://www.gov.uk/government/statistics/emissions-of-air-pollutants/emissions-of-](https://www.gov.uk/government/statistics/emissions-of-air-pollutants/emissions-of-air-pollutants-in-the-uk-particulate-matter-pm10-and-pm25)  
4 [air-pollutants-in-the-uk-particulate-matter-pm10-and-pm25](https://www.gov.uk/government/statistics/emissions-of-air-pollutants/emissions-of-air-pollutants-in-the-uk-particulate-matter-pm10-and-pm25)> (2022).
- 5 35 Schneider, R. *et al.* A satellite-based spatio-temporal machine learning model to  
6 reconstruct daily PM2.5 concentrations across Great Britain. *Remote Sensing* **12**  
7 (2020). <https://doi.org/10.3390/rs12223803>
- 8 36 Li, Z., Yim, S. H.-L. & Ho, K.-F. High temporal resolution prediction of street-level  
9 PM2.5 and NOx concentrations using machine learning approach. *Journal of*  
10 *Cleaner Production* **268** (2020). <https://doi.org/10.1016/j.jclepro.2020.121975>
- 11 37 Smith, T. J. & Kriebel, D. in *Current topics in occupational epidemiology* (ed K. M.  
12 Venables) (Oxford University Press, 2013).

13

14

## 1 **Figure Legend**

### 2 **Figure 1. Age- and sex-adjusted geometric mean PM<sub>2.5</sub> concentrations (µg/m<sup>3</sup>)** 3 **recorded in the personal, kitchen, living room, and community monitors by season** 4 **and the combination of primary cooking and heating fuels**

5 Each vertical bar represents adjusted geometric means of each microenvironment by  
6 exposure groups, with vertical black lines showing the corresponding 95% confidence  
7 intervals (CIs). Non-overlapping CIs between bars indicate statistically significant  
8 difference. From left to right the four bars in each group are personal, kitchen, living room,  
9 and community PM<sub>2.5</sub> levels. Participants reporting using unspecified “other” fuels for  
10 heating were excluded due to small sample size ( $N_{\text{summer}} = 1$ ;  $N_{\text{winter}} = 2$ ).

### 11 **Figure 2. 24-hour average time-series plots for PM<sub>2.5</sub> concentrations (µg/m<sup>3</sup>)** 12 **recorded in the personal, kitchen, living room, and community monitors by season** 13 **and primary cooking fuel combinations**

14 There were 123 (13761 person-hour), 167 (18663 person-hour) and 94 (10607 person-  
15 hour) subjects for the “Solid fuels included”, “Clean fuels” and “No cooking” group in  
16 summer, respectively; There were 126 (13174 person-hour), 173 (17956 person-hour) and  
17 65 (6819 person-hour) subjects for the “Solid fuels included”, “Clean fuels” and “No  
18 cooking” group in winter, respectively. Smaller plots nested within panels are “zoom-in”  
19 version of the corresponding plot, as the use of a universal y-axis limit up to 1200 with  
20 reference to the kitchen exposure levels impaired the readability of those plots.

### 21 **Figure 3. 24-hour average time-series plots for PM<sub>2.5</sub> concentrations (µg/m<sup>3</sup>)** 22 **recorded in the personal, kitchen, living room, and community monitors by season** 23 **and primary heating fuel combinations**

24 There were 200 (22539 person-hours), 47 (5226 person-hours) and 136 (15147 person-  
25 hours) subjects for the “Solid fuels included”, “Clean only” and “No heating” group in

1 summer, respectively; There were 207 (21772 person-hours), 43 (4261 person-hours) and  
2 112 (11701 person-hours) subjects for the “Solid fuels included”, “Clean only” and “No  
3 heating” group in winter, respectively. Smaller plots nested within panels are “zoom-in”  
4 version of the corresponding plot, as the use of a universal y-axis limit up to 1200 with  
5 reference to the kitchen exposure levels impaired the readability of those plots.

6 **Figure 4. The correlation matrix between the log-transformed concentrations of**  
7 **PM<sub>2.5</sub> at personal, kitchen, living room and community levels**

8 Red area under curves and dots are summer data; blue area under curves and dots are  
9 winter data; black numbers in boxes are overall Spearman correlation coefficient; red and  
10 blue numbers are summer- and winter-specific correlation.

**Table 1. Age- and sex-adjusted geometric mean (95% CI) PM<sub>2.5</sub> concentrations (µg/m<sup>3</sup>) recorded in the personal, kitchen, and living room monitors by season and key characteristics.**

| Characteristics                                | Summer |                  |                  |                  | Winter |                  |                     |                  |
|------------------------------------------------|--------|------------------|------------------|------------------|--------|------------------|---------------------|------------------|
|                                                | N*     | Personal         | Kitchen          | Living room      | N*     | Personal         | Kitchen             | Living room      |
| <b>Personal characteristics</b>                |        |                  |                  |                  |        |                  |                     |                  |
| <b>Age<sup>†</sup></b>                         |        |                  |                  |                  |        |                  |                     |                  |
| < 65 years                                     | 323    | 42.0 (40.2-43.9) | 43.9 (41.8-46.2) | 33.5 (32.1-34.9) | 305    | 59.5 (56.2-63.1) | 82.8 (77.2-88.8)    | 56.1 (52.9-59.4) |
| ≥ 65 years                                     | 61     | 33.5 (30.7-36.5) | 43.0 (39.0-47.5) | 31.9 (29.4-34.6) | 59     | 48.9 (43.6-54.9) | 62.9 (54.7-72.2)    | 49.2 (43.9-55.1) |
| <b>Sex<sup>‡</sup></b>                         |        |                  |                  |                  |        |                  |                     |                  |
| Female                                         | 287    | 40.9 (39.3-42.6) | 44.4 (42.4-46.5) | 32.7 (31.4-33.9) | 267    | 66.1 (62.6-69.8) | 87.6 (82.1-93.5)    | 61.1 (57.9-64.5) |
| Male                                           | 97     | 39.8 (37.2-42.7) | 43.3 (40.1-46.9) | 33.7 (31.6-36.0) | 97     | 50.2 (45.8-55.0) | 72.0 (64.5-80.4)    | 49.4 (45.1-54.1) |
| <b>Education</b>                               |        |                  |                  |                  |        |                  |                     |                  |
| No formal education                            | 97     | 48.9 (45.1-53.1) | 52.3 (47.6-57.5) | 38.2 (35.3-41.3) | 92     | 75.8 (67.9-84.7) | 112.6 (98.7-128.5)  | 70.2 (62.9-78.3) |
| Primary & middle school                        | 133    | 38.8 (36.5-41.4) | 42.8 (39.8-46.0) | 30.4 (28.7-32.3) | 125    | 58.5 (53.8-63.5) | 84.0 (76.1-92.8)    | 58.4 (53.8-63.4) |
| High school or above                           | 154    | 38.4 (36.3-40.7) | 41.6 (39.0-44.4) | 33.3 (31.5-35.1) | 147    | 50.9 (47.1-55.0) | 66.0 (60.2-72.4)    | 47.4 (44.0-51.2) |
| <b>Occupation</b>                              |        |                  |                  |                  |        |                  |                     |                  |
| Agricultural worker                            | 140    | 53.2 (50.3-56.3) | 59.9 (56.2-63.9) | 38.0 (36.0-40.2) | 138    | 74.6 (69.2-80.4) | 120.0 (109.6-131.3) | 69.0 (63.9-74.4) |
| Factory worker                                 | 20     | 34.4 (29.7-39.9) | 39.1 (33.0-46.2) | 31.7 (27.4-36.6) | 18     | 59.0 (47.9-72.7) | 59.2 (46.0-76.1)    | 36.9 (29.9-45.5) |
| Home-maker                                     | 106    | 40.1 (37.3-43.2) | 43.2 (39.7-47.0) | 32.9 (30.6-35.4) | 109    | 68.6 (62.3-75.5) | 88.4 (78.8-99.2)    | 65.3 (59.3-72.0) |
| Non-manual labour                              | 9      | 33.4 (27.0-41.4) | 29.0 (22.7-37.0) | 26.2 (21.2-32.4) | 10     | 62.0 (47.1-81.8) | 46.0 (33.0-64.2)    | 45.2 (34.2-59.7) |
| Self/ un-employed or other                     | 109    | 29.1 (27.2-31.1) | 30.7 (28.4-33.1) | 28.5 (26.7-30.5) | 89     | 31.6 (28.7-34.8) | 43.7 (39.0-49.1)    | 37.4 (33.9-41.2) |
| <b>Smoking now</b>                             |        |                  |                  |                  |        |                  |                     |                  |
| No                                             | 328    | 38.6 (36.5-40.8) | 44.7 (42.0-47.6) | 29.2 (27.7-30.8) | 303    | 52.1 (48.2-56.3) | 75.0 (68.3-82.3)    | 49.1 (45.5-53.0) |
| Yes                                            | 56     | 45.1 (40.7-50.1) | 41.9 (37.2-47.2) | 45.6 (41.3-50.3) | 61     | 71.9 (62.7-82.4) | 90.2 (76.5-106.3)   | 70.5 (61.6-80.7) |
| <b>Household air pollution-related factors</b> |        |                  |                  |                  |        |                  |                     |                  |
| <b>Household size</b>                          |        |                  |                  |                  |        |                  |                     |                  |
| ≤ 4 persons                                    | 196    | 39.6 (37.7-41.7) | 42.6 (40.2-45.2) | 34.2 (32.6-35.9) | 190    | 55.5 (51.8-59.5) | 78.9 (72.6-85.8)    | 55.9 (52.2-59.9) |
| > 4 persons                                    | 188    | 41.2 (39.0-43.5) | 45.3 (42.6-48.1) | 32.0 (30.5-33.7) | 174    | 60.0 (55.8-64.5) | 79.9 (73.3-87.2)    | 53.8 (50.1-57.8) |
| <b>Cooking frequency</b>                       |        |                  |                  |                  |        |                  |                     |                  |
| Daily                                          | 301    | 41.4 (39.1-43.8) | 43.7 (41.0-46.6) | 34.4 (32.7-36.3) | 280    | 59.1 (54.6-64.0) | 82.4 (74.9-90.6)    | 55.3 (51.1-59.8) |
| Daily but not personal/ infrequent             | 83     | 38.6 (35.7-41.8) | 44.2 (40.3-48.3) | 31.1 (28.8-33.5) | 84     | 55.2 (49.5-61.5) | 74.9 (65.7-85.3)    | 54.4 (48.8-60.6) |
| <b>Smoky home while cooking</b>                |        |                  |                  |                  |        |                  |                     |                  |
| No                                             | 222    | 37.2 (35.2-39.2) | 40.9 (38.5-43.5) | 32.4 (30.8-34.1) | 196    | 45.7 (42.4-49.1) | 61.8 (56.6-67.6)    | 46.8 (43.4-50.3) |
| Yes                                            | 120    | 46.1 (43.0-49.3) | 53.7 (49.7-58.0) | 35.1 (32.9-37.4) | 127    | 74.9 (68.7-81.6) | 119.5 (107.7-132.5) | 67.7 (62.1-73.8) |
| <b>Smoky home while heating</b>                |        |                  |                  |                  |        |                  |                     |                  |
| No                                             | 163    | 44.3 (41.8-47.0) | 44.1 (41.3-47.2) | 34.0 (32.1-35.9) | 151    | 55.3 (51.2-59.8) | 72.6 (66.2-79.6)    | 54.2 (50.2-58.4) |
| Yes                                            | 85     | 39.9 (36.8-43.1) | 51.4 (46.9-56.4) | 29.5 (27.4-31.8) | 101    | 82.0 (74.9-89.7) | 127.9 (114.8-142.4) | 72.5 (66.4-79.2) |

1 \*Number of subjects. † Only adjusted for sex. ‡ Only adjusted for age.

2

3



1  
2  
3  
4  
5  
6  
7  
8  
9  
10  
11

**Table 2. Age- and sex-adjusted estimated annual mean PM<sub>2.5</sub> exposure levels (µg/m<sup>3</sup>) for the personal, kitchen, living room, and community environments by cooking and heating fuel category \***

| <b>Cooking and heating fuel category</b>            | <b>Personal</b>  | <b>Kitchen</b>      | <b>Living room</b> | <b>Community</b> |
|-----------------------------------------------------|------------------|---------------------|--------------------|------------------|
| <b>Primary cooking fuel combination</b>             |                  |                     |                    |                  |
| No cooking (n=71)                                   | 45.2 (39.3-52.1) | 60.6 (49.9-73.6)    | 42.6 (37.7-48.3)   | 55.0 (49.7-60.9) |
| Clean fuels only (n=135)                            | 57.8 (52.3-63.9) | 69.5 (60.5-79.9)    | 49.9 (45.7-54.6)   | 56.3 (52.1-60.8) |
| Solid fuels included (n=101)                        | 86.7 (76.5-98.3) | 121.6 (102.3-144.6) | 68.9 (61.7-76.9)   | 63.1 (57.1-69.8) |
| <b>Primary heating fuel combination</b>             |                  |                     |                    |                  |
| No heating (n=98)                                   | 50.2 (44.4-56.8) | 65.9 (55.7-77.9)    | 47.2 (42.4-52.7)   | 56.3 (51.8-61.2) |
| Clean fuels only (n=39)                             | 43.4 (36.1-52.2) | 44.5 (34.6-57.2)    | 39.3 (33.4-46.3)   | 53.7 (47.7-60.6) |
| Solid fuels included (n=169)                        | 76.3 (69.2-84.2) | 103.5 (90.6-118.3)  | 61.3 (56.3-66.9)   | 61.4 (56.3-66.9) |
| <b>Primary cooking and heating fuel combination</b> |                  |                     |                    |                  |
| No cooking or heating (n=29)                        | 38.4 (31.0-47.6) | 50.1 (37.2-67.6)    | 41.1 (33.8-50.1)   | 60.0 (51.2-70.3) |
| Clean fuels only (n=37)                             | 40.9 (34.2-48.9) | 43.5 (33.9-55.8)    | 37.9 (32.1-44.7)   | 53.2 (46.7-60.7) |
| Solid fuels included (n=189)                        | 77.8 (71.1-85.2) | 103.7 (91.5-117.6)  | 62.0 (57.1-67.4)   | 61.7 (56.4-67.6) |

\* Annual mean level was estimated using the regional temperature data from 2005-2017, the number of months with average temperature <10 degrees are 3/12 in Suzhou, 5/12 in Gansu, 4/12 in Henan. Using the same data, the proportion of days with ≤10 degrees daily average temperature are 1233/4717 (26.1%) in Suzhou, 1921/4717 (40.7%) in Gansu, 1524/4717 (32.7%) in Henan.

1 **Figure 1. Age- and sex-adjusted geometric mean PM<sub>2.5</sub> concentrations (µg/m<sup>3</sup>) recorded in the personal, kitchen, living room, and community monitors by season and the combination of primary cooking and heating fuels**  
 2

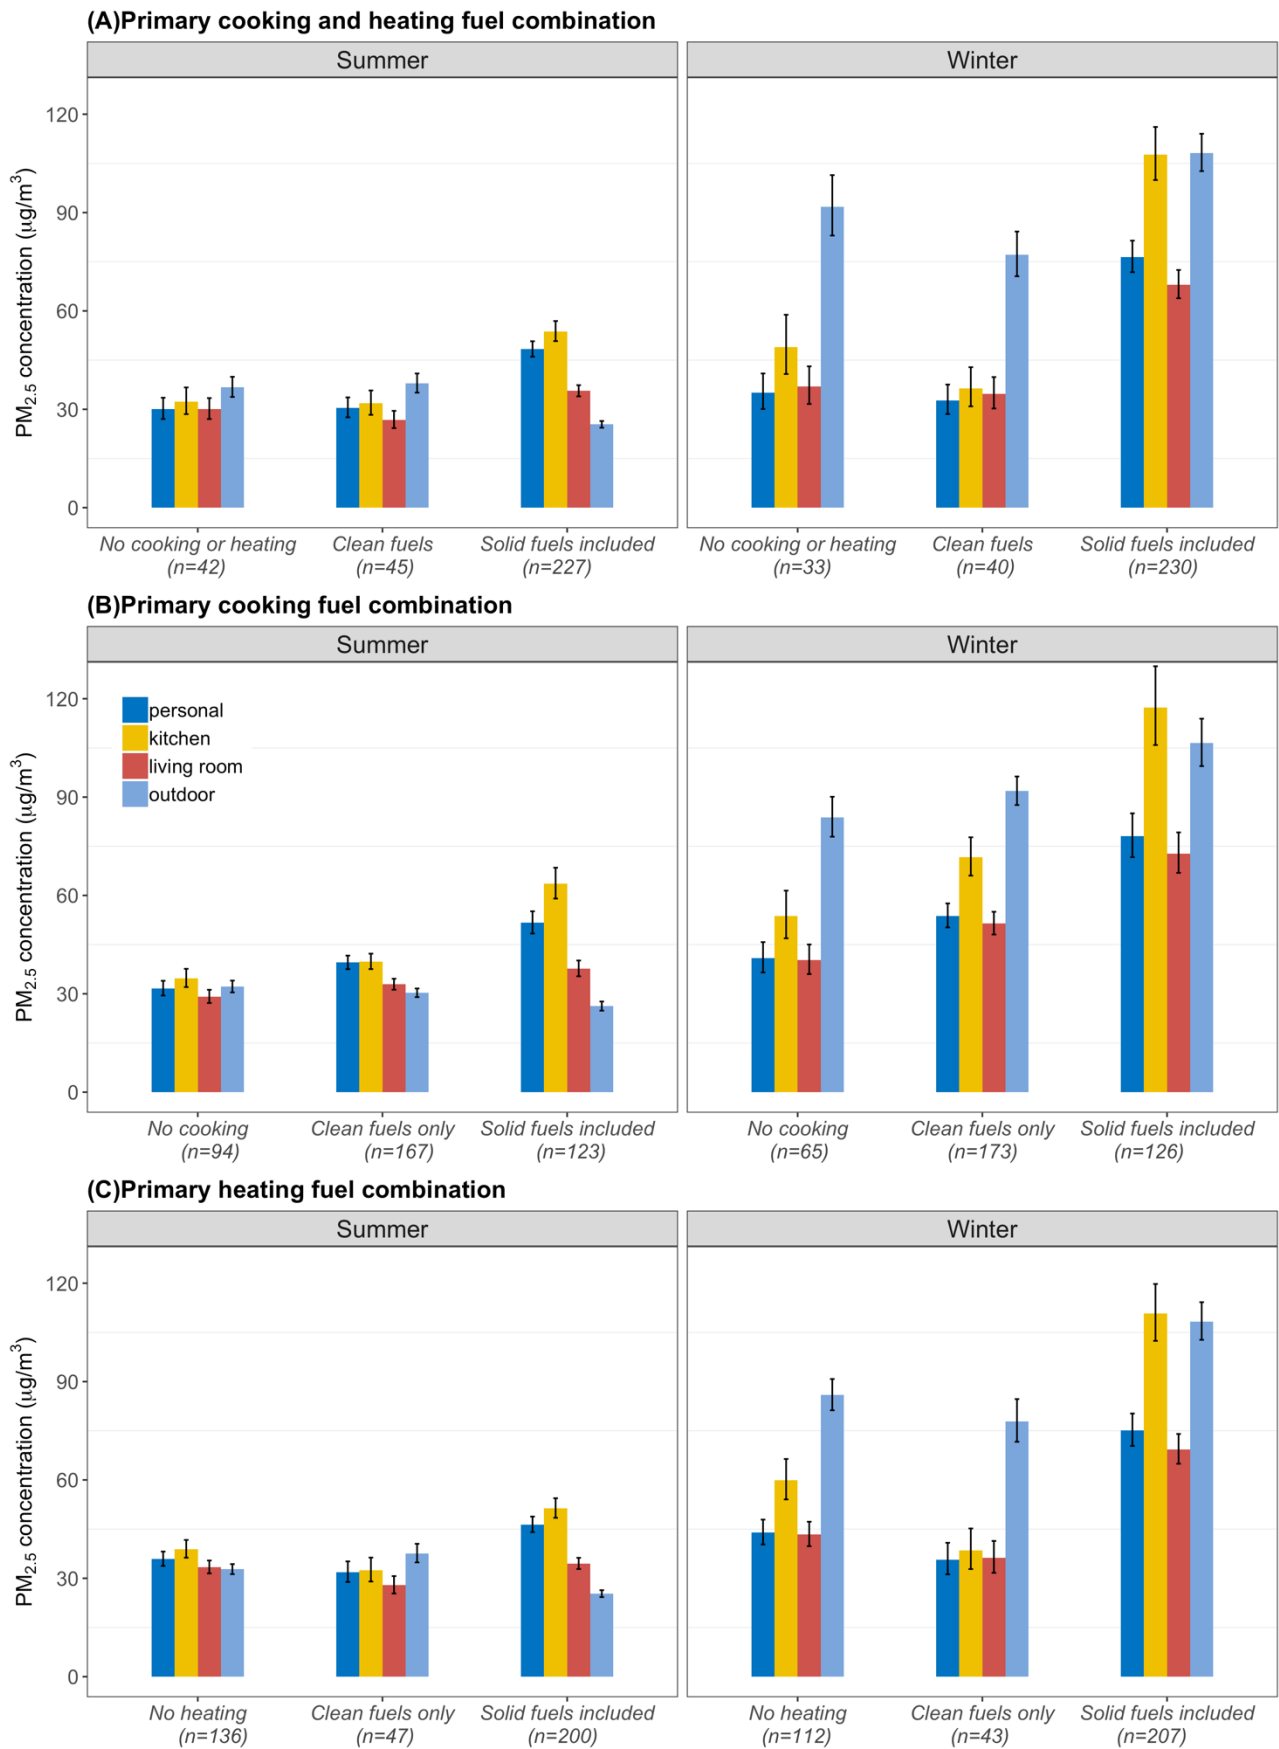

3

4

1 **Figure 2. 24-hour average time-series plots for PM<sub>2.5</sub> concentrations (µg/m<sup>3</sup>) recorded in the personal, kitchen, living room, and community monitors by season and primary cooking fuel combinations**  
 2

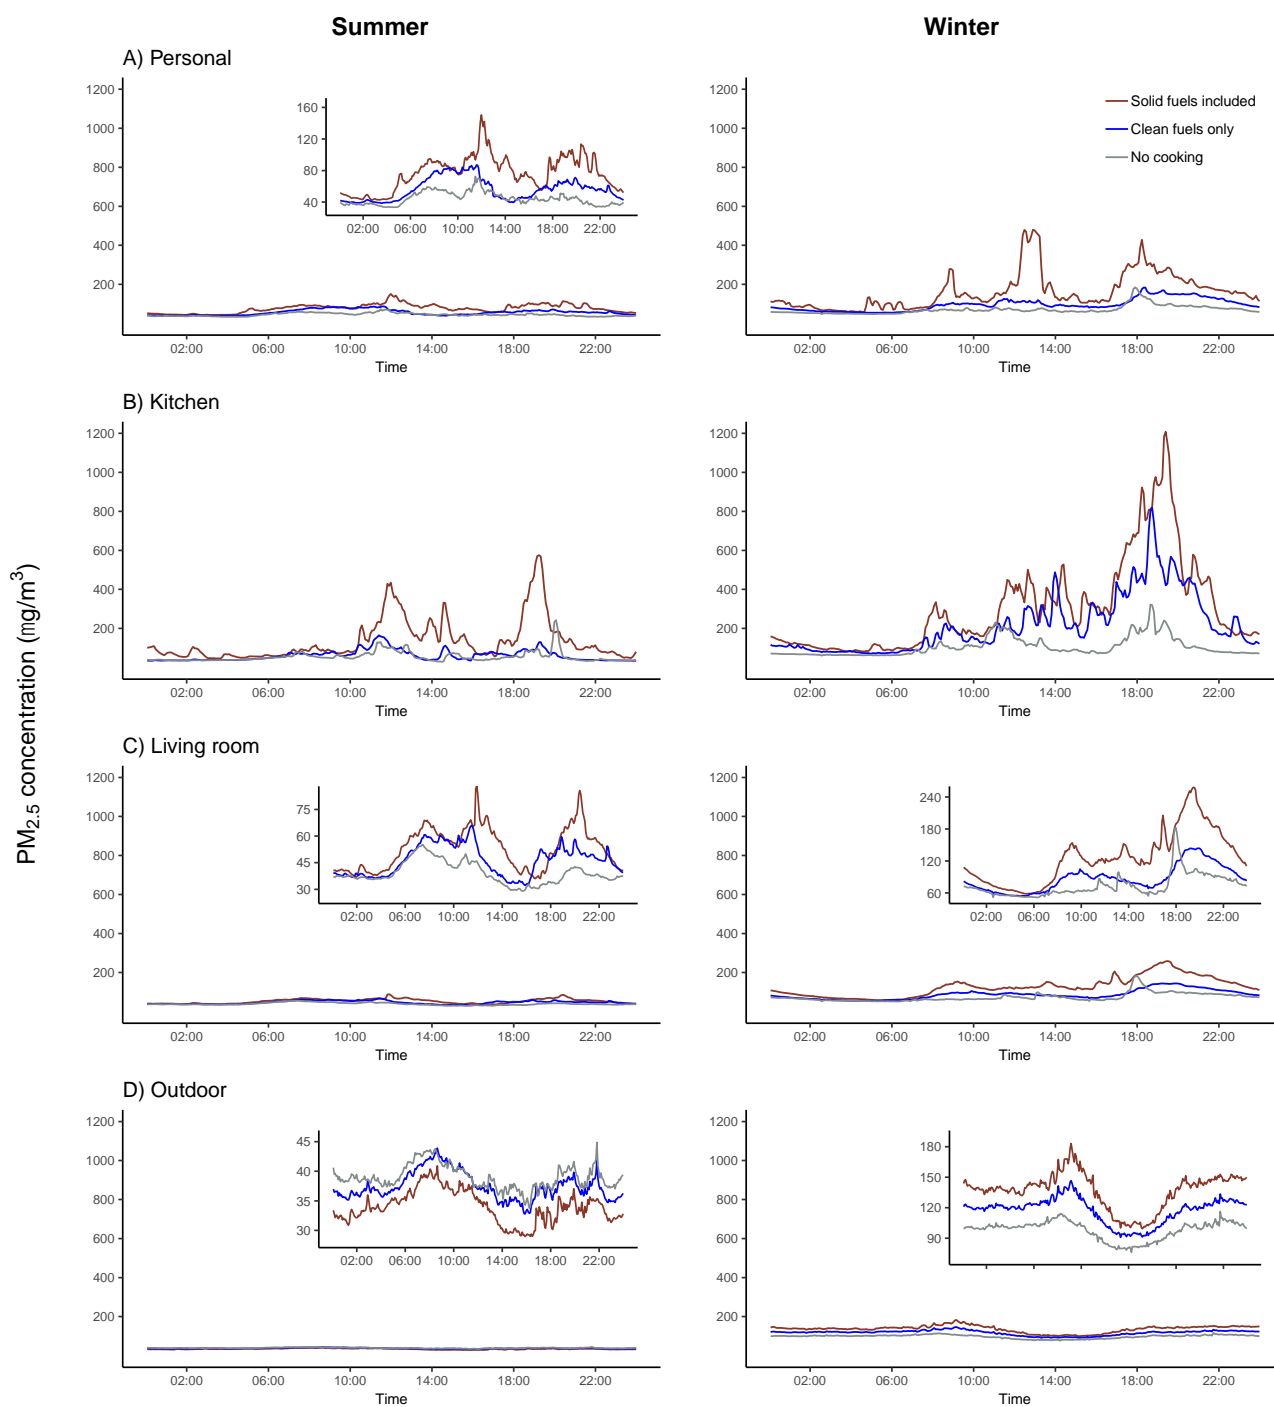

1 **Figure 3. 24-hour average time-series plots for PM<sub>2.5</sub> concentrations (µg/m<sup>3</sup>) recorded in the personal, kitchen, living room, and community monitors by season and primary heating fuel combinations**  
2

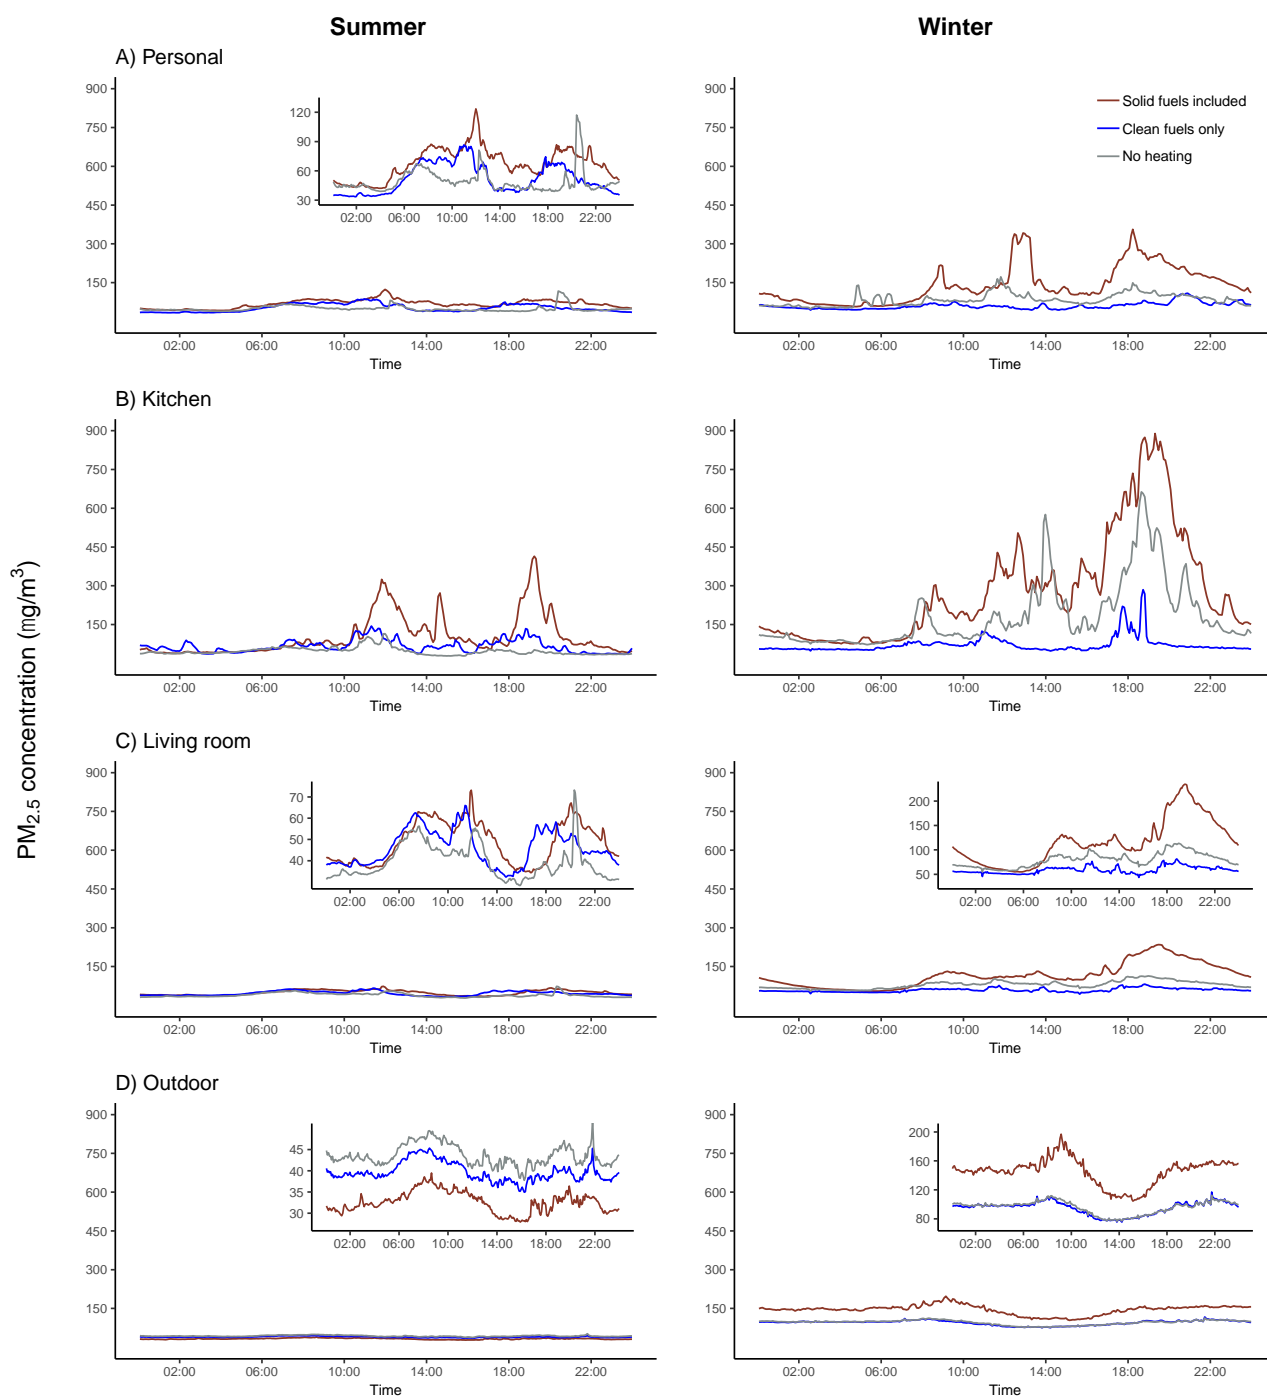

1 **Figure 4. The correlation matrix between the log-transformed concentrations of PM for personal, kitchen, living**  
 2 **room and community levels**

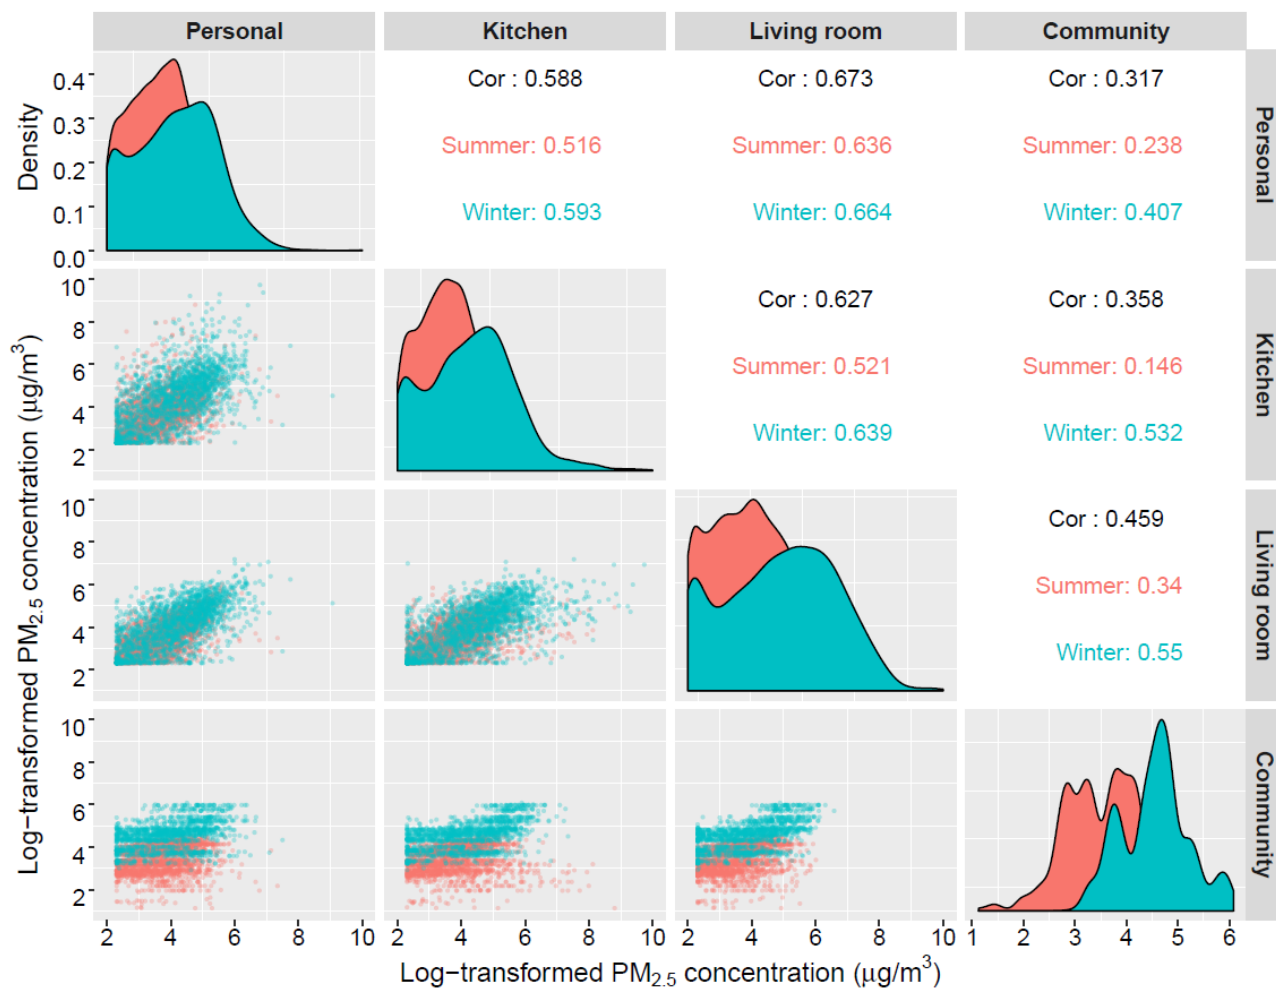

3

## 1 **Acknowledgements:**

2 The chief acknowledgment is to the participants, the project staff, and the China National  
3 Centre for Disease Control and Prevention (CDC) and its regional offices for assisting with  
4 the fieldwork. We thank Judith Mackay in Hong Kong; Yu Wang, Gonghuan Yang, Zhengfu  
5 Qiang, Lin Feng, Maigeng Zhou, Wenhua Zhao, and Yan Zhang in China CDC; Lingzhi  
6 Kong, Xiucheng Yu, and Kun Li in the Chinese Ministry of Health; and Garry Lancaster,  
7 Sarah Clark, Martin Radley, Mike Hill, Hongchao Pan, and Jill Boreham in the CTSU,  
8 Oxford, for assisting with the design, planning, organization, and conduct of the study.

9 The CKB baseline survey and the first re-survey were supported by the Kadoorie  
10 Charitable Foundation in Hong Kong. The long-term follow-up has been supported by  
11 Wellcome grants to Oxford University (212946/Z/18/Z, 202922/Z/16/Z, 104085/Z/14/Z,  
12 088158/Z/09/Z) and grants from the National Natural Science Foundation of China  
13 (82192900, 82192901, 82192904) and from the National Key Research and Development  
14 Program of China (2016YFC0900500). The UK Medical Research Council  
15 (MC\_UU\_00017/1, MC\_UU\_12026/2, MC\_U137686851), Cancer Research UK  
16 (C16077/A29186; C500/A16896) and the British Heart Foundation (CH/1996001/9454),  
17 provide core funding to the Clinical Trial Service Unit and Epidemiological Studies Unit at  
18 Oxford University for the project. KHC acknowledges support from the BHF Centre of  
19 Research Excellence, University of Oxford (RE/18/3/34214). AD is supported by the  
20 Wellcome Trust (223100/Z21/Z). The CKB-Air study was supported by a UK Medical  
21 Research Council: Global Challenges Research Fund – Foundation Award (Ref  
22 MR/P025080/1) and a Nuffield Department of Population Health Pump-priming Award.

## 23 **Open Access Statement:**

24 This research was funded in whole, or in part, by the Wellcome Trust [Grant number  
25 212946/Z/18/Z, 202922/Z/16/Z, 104085/Z/14/Z, 088158/Z/09/Z, 223100/Z21/Z]. For the purpose

1 of Open Access, the author has applied a CC-BY public copyright licence to any Author  
2 Accepted Manuscript version arising from this submission.

### 3 **Data Access Statement:**

4 The China Kadoorie Biobank (CKB) is a global resource for the investigation of lifestyle,  
5 environmental, blood biochemical and genetic factors as determinants of common  
6 diseases. The CKB study group is committed to making the cohort data available to the  
7 scientific community in China, the UK and worldwide to advance knowledge about the  
8 causes, prevention and treatment of disease. For detailed information on what data is  
9 currently available to open access users and how to apply for it,  
10 visit: <http://www.ckbiobank.org/site/Data+Access>.

11 Researchers who are interested in obtaining the raw data from the China Kadoorie  
12 Biobank study that underlines this paper should contact [ckbaccess@ndph.ox.ac.uk](mailto:ckbaccess@ndph.ox.ac.uk). A  
13 research proposal will be requested to ensure that any analysis is performed by bona fide  
14 researchers.

### 15 **Declaration of interest:**

16 The authors declare no known conflict of interest.

### 17 **CRedit authorship contribution statement:**

18 Ka Hung Chan: Conceptualization, Methodology, Software, Formal analysis, Investigation,  
19 Resources, Data curation, Writing – original draft, Writing – review & editing, Visualization,  
20 Project administration, Supervision. Xi Xia: Methodology, Software, Formal analysis,  
21 Investigation, Writing – review & editing, Visualization. Cong Liu, Haidong Kan:  
22 Methodology, Resources, Data curation, Writing – review & editing. Aiden Doherty:  
23 Methodology, Investigation, Writing – review & editing. Hung Lam Steve Yim:  
24 Methodology, Resources, Writing – review & editing. Neil Wright, Christiana Kartsonaki:

1 Methodology, Software, Data curation, Writing – review & editing. Xiaoming Yang,  
2 Rebecca Stevens: Resources, Data curation, Software. Xiaoyu Chang: Resources, Project  
3 administration. Canqing Yu, Jun Lv, Liming Li: Resources, Project administration, Funding  
4 acquisition. Kin-Fai Ho: Conceptualization, Methodology, Resources, Writing – review &  
5 editing, Supervision. Kin Bong Hubert Lam, Zhengming Chen: Conceptualization,  
6 Methodology, Resources, Writing – review & editing, Project administration, Supervision,  
7 Funding acquisition.

8

9
